# Supplementary material for: Genomic Deregulation during Metastasis of Renal Cell Carcinoma Implements a Myofibroblast-Like Program of Gene Expression
Source: Oxford University Press journal article supplement (doi:10.1158/0008-5472.can-10-2279), 2010-10-15
Supplement: 00085472can102279-sup-sfi_g6.pdf [file 00085472can102279-sup-sfi_g6.pdf]

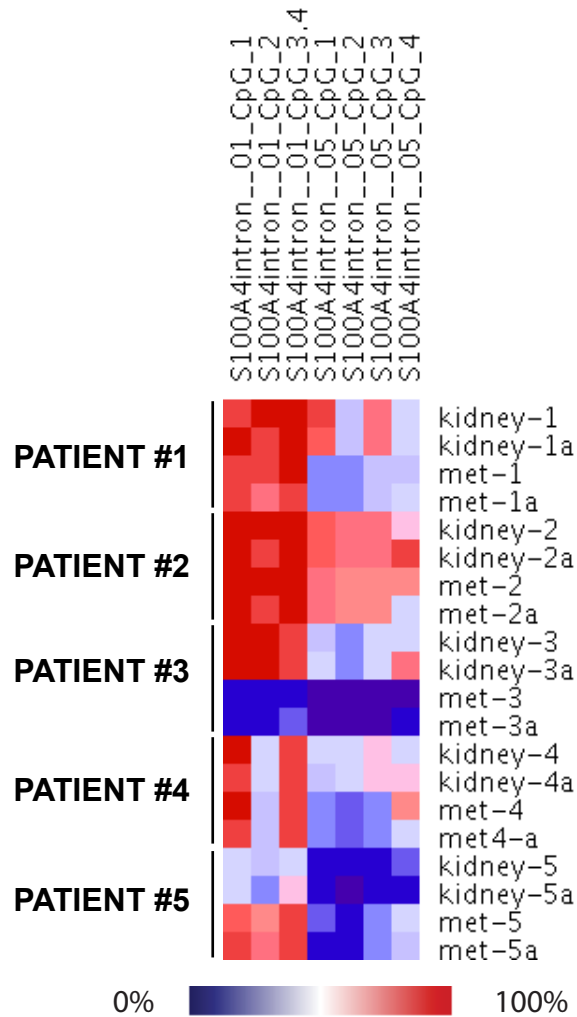

**FIGURE S6. EpiTYPER analysis of methylation of the S100A4 promoter in a panel of human RCC tumors** Consistent with the data on the cell lines, RCC metastatic samples show widespread de-methylation of S100A4 promoter.
