# Supplementary material for: Genomic Deregulation during Metastasis of Renal Cell Carcinoma Implements a Myofibroblast-Like Program of Gene Expression
Source: Oxford University Press journal article supplement (doi:10.1158/0008-5472.can-10-2279), 2010-10-15
Supplement: 00085472can102279-sup-sfi_g8.pdf [file 00085472can102279-sup-sfi_g8.pdf]

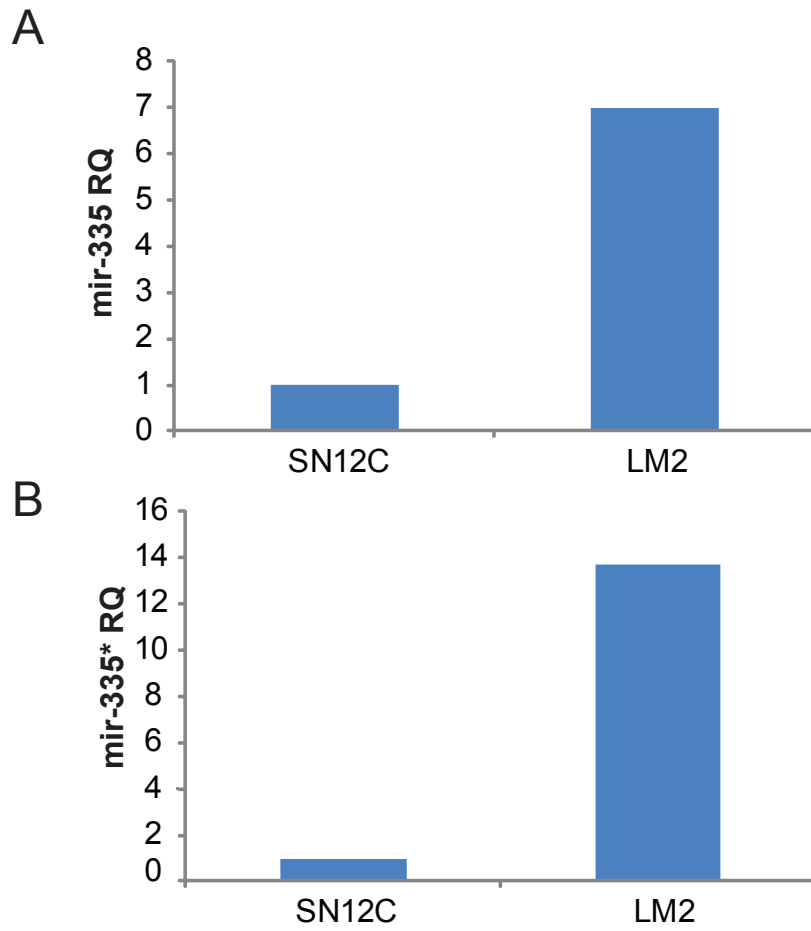

**FIG. S8. Validation of miRNA expression changes during SN12C-LM2 transition.** qRT-PCR analysis of levels for mir-335 (A) and mir-335\*(B) in the indicated cell lines performed in triplicate.
