# Supplementary material for: Genomic Deregulation during Metastasis of Renal Cell Carcinoma Implements a Myofibroblast-Like Program of Gene Expression
Source: Oxford University Press journal article supplement (doi:10.1158/0008-5472.can-10-2279), 2010-10-15
Supplement: 00085472can102279-sup-sfi_g9.pdf [file 00085472can102279-sup-sfi_g9.pdf]

| <i>chromosome</i> | <i>start</i> | <i>end</i> | <i>CN.p-value(Attribute)</i> | <i>Chi-Square(Attribute)</i> | <i>length (bps)</i> | <i># abnormal samples</i> | <i>LM Above</i> | <i>LM Below</i> | <i>SN12C Above</i> | <i>SN12C Below</i> | <i>Probes et ID</i> | <i>p-value(LM vs SN12C)</i> | <i>Fold-Change (LM vs SN12C)</i> |
|-------------------|--------------|------------|------------------------------|------------------------------|---------------------|---------------------------|-----------------|-----------------|--------------------|--------------------|---------------------|-----------------------------|----------------------------------|
| 4                 | 38284700     | 41490445   | 0.0455                       | 4                            | 3205746             | 4                         | 0               | 3               | 1                  | 0                  | hsa-miR-574-3p      | 0.00068                     | -1.5493                          |
| 4                 | 41440        | 15525270   | 0.0455                       | 4                            | 15483831            | 3                         | 0               | 3               | 0                  | 0                  | hsa-miR-95          | 0.00472                     | -2.2964                          |

**FIG. S9. Integration between DNA copy variation and miRNA expression during the transition SN12C-LM**

We integrated the DNA copy number variation data with the miRNA expression profiling based on the overlap of the genomic positions of corresponding probes or regions. DNA copy number analysis was done using Gain and Loss Analysis of DNA (GLAD) segmentation algorithm, which calls the significant gain and loss regions in the genome. The integration of the statistically differentiated miRNAs with these copy number regions was done based on their genomic location overlap.
