# Supplementary material for: Genomic Deregulation during Metastasis of Renal Cell Carcinoma Implements a Myofibroblast-Like Program of Gene Expression
Source: Oxford University Press journal article supplement (doi:10.1158/0008-5472.can-10-2279), 2010-10-15
Supplement: 00085472can102279-sup-sfig_1.pdf [file 00085472can102279-sup-sfig_1.pdf]

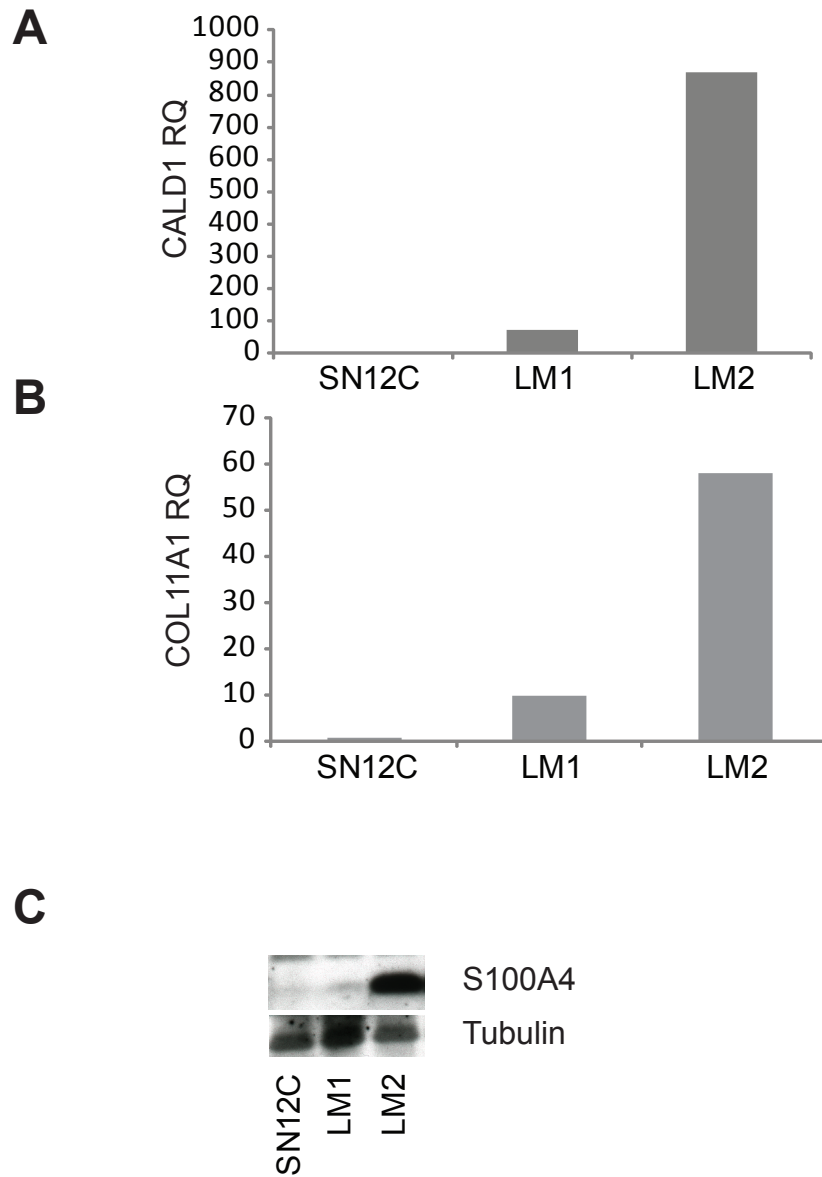

**FIG. S1. Validation of differentially expressed genes in SN12C and LM cell lines.** Real-time RT-PCR analysis of transcript levels of CALD1 (A) COL11A1 (B) and protein levels of S100A4 (C).
