# Supplementary material for: Genomic Deregulation during Metastasis of Renal Cell Carcinoma Implements a Myofibroblast-Like Program of Gene Expression
Source: Oxford University Press journal article supplement (doi:10.1158/0008-5472.can-10-2279), 2010-10-15
Supplement: 00085472can102279-sup-sfig_2.pdf [file 00085472can102279-sup-sfig_2.pdf]

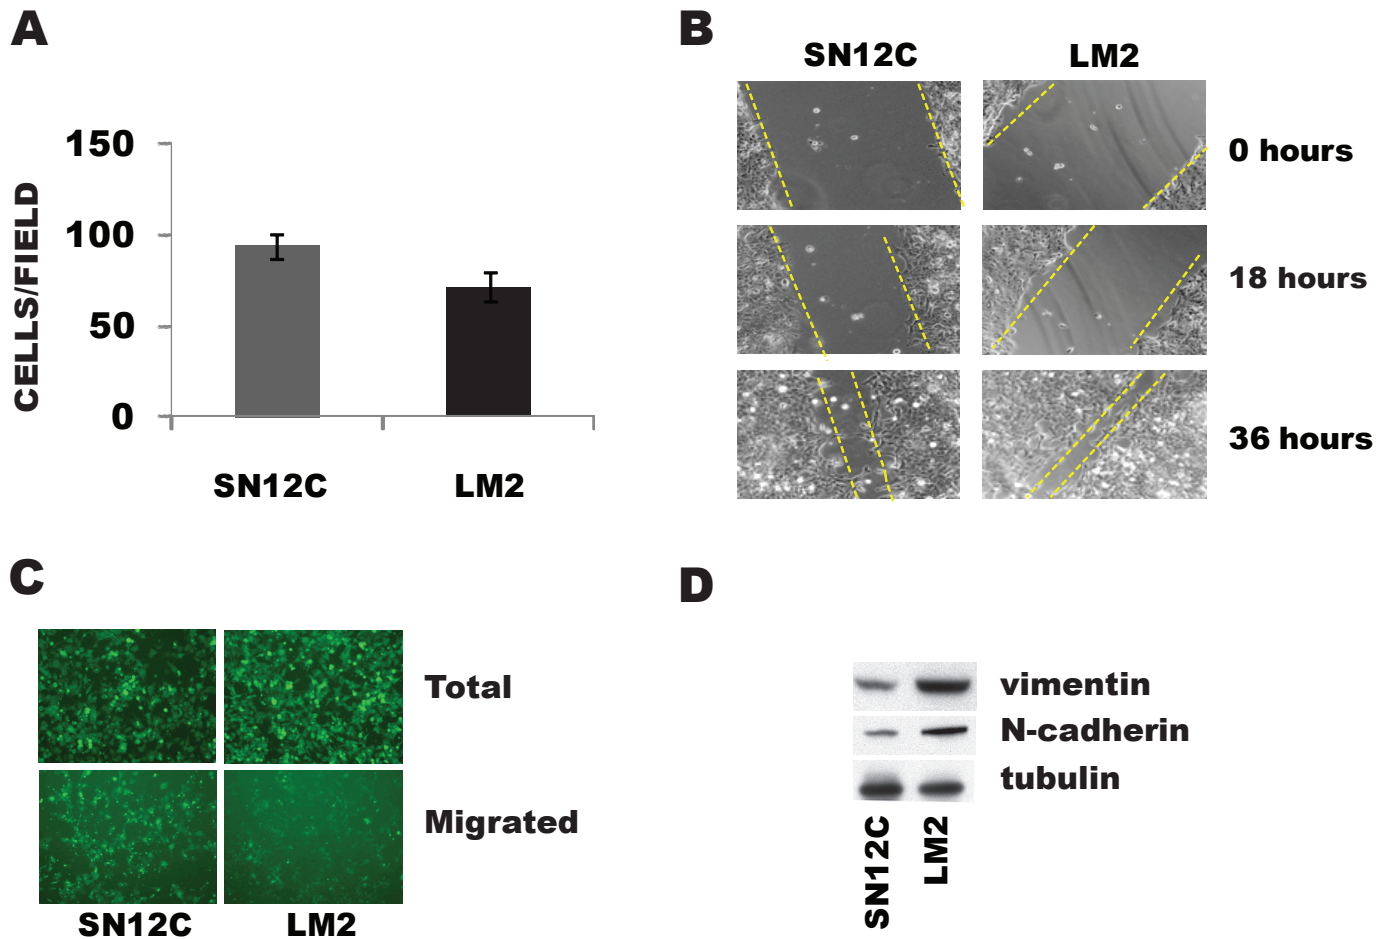

**FIG. S2 Figure 2. Metastatic activity does not correlate with invasion and migration.** (A) SN12C and LM2 cells were starved for 24 hours and plated on the top of a Boyden chamber coated with matrigel in serum-free medium. The lower chamber was filled with medium containing serum. After 16 hours, cells that moved to the lower side of the chamber were scored. (B) 2D movement was monitored using a scratch assay. After cells reached confluence, a scratch was made and cells were allowed to move in for the indicated times. (C) Trans-endothelial invasion assay. Indicated tumor cells (labeled with cell tracker green) were seeded on insert chambers coated with a monolayer of endothelial cell (HUVECs). After 10 hours, cells on the apical side of each insert were scraped off and cells that moved to the lower side of the chamber were monitored under the microscope. (D) Equal amounts of total proteins were subjected to immunoblotting with antibodies against the indicated antigens.
