# Supplementary material for: Genomic Deregulation during Metastasis of Renal Cell Carcinoma Implements a Myofibroblast-Like Program of Gene Expression
Source: Oxford University Press journal article supplement (doi:10.1158/0008-5472.can-10-2279), 2010-10-15
Supplement: 00085472can102279-sup-sfig_3.pdf [file 00085472can102279-sup-sfig_3.pdf]

| ID      | gene name  | LM2 vs SN12C | ID      | gene name   | LM2 vs SN12C |
|---------|------------|--------------|---------|-------------|--------------|
| 217871  | ε MIF      | -63.75       | 230788  | ε GCNT2     | -3.09        |
| 202859  | γ IL8      | -48.79       | 207992  | ε AMPD3     | -3.09        |
| 204614  | ε SERPINE  | -38.24       | 203799  | ε CD302     | -3.07        |
| 209774  | γ CXCL2    | -28.75       | 209487  | ε RBPMS     | -3.06        |
| 1555623 | ---        | -15.49       | 228128  | γ PAPPA     | -3.06        |
| 214974  | γ CXCL5    | -14.87       | 228423  | ε MAP9      | -3.06        |
| 207850  | ε CXCL3    | -12.95       | 216550  | γ ANKRD1    | -3.05        |
| 221729  | ε COL5A2   | -12.38       | 204602  | ε DKK1      | -3.03        |
| 210665  | ε TFPI     | -11.42       | 210379  | ε TLK1      | -3.02        |
| 226415  | ε VAT1L    | -10.02       | 202499  | ε SLC2A3    | -2.99        |
| 204470  | ε CXCL1    | -9.99        | 218486  | ε KLF11     | -2.98        |
| 206941  | γ SEMA3E   | -9.65        | 218810  | ε ZC3H12A   | -2.98        |
| 239250  | ε ZNF542   | -9.29        | 209278  | ε TFPI2     | -2.97        |
| 223484  | ε C15orf48 | -9.19        | 223427  | ε EPB41L4   | -2.97        |
| 221019  | ε COLEC1   | -7.57        | 209392  | ε ENPP2     | -2.95        |
| 208025  | ε HMGA2    | -7.50        | 227180  | ε ELOVL7    | -2.95        |
| 208650  | ε CD24     | -7.36        | 218692  | ε GOLSYN    | -2.94        |
| 201645  | ε TNC      | -7.28        | 212724  | ε RND3      | -2.92        |
| 223218  | ε NFKBIZ   | -7.17        | 225381  | ε LOC3999   | -2.87        |
| 220346  | ε MTHFD2L  | -7.04        | 44783   | s HEY1      | -2.85        |
| 201117  | ε CPE      | -7.03        | 219557  | ε NRIP3     | -2.84        |
| 205207  | ε IL6      | -6.97        | 209529  | ε PPAP2C    | -2.84        |
| 224567  | γ MALAT1   | -6.49        | 205542  | ε STEAP1    | -2.84        |
| 219837  | ε CYTL1    | -6.19        | 238846  | ε TNFRSF    | -2.84        |
| 206969  | ε KRT34    | -6.12        | 214055  | γ BAT2D1    | -2.81        |
| 231807  | ε KIAA1217 | -6.11        | 214157  | ε GNAS      | -2.81        |
| 202948  | ε IL1R1    | -6.10        | 202508  | ε SNAP25    | -2.81        |
| 217979  | ε TSPAN13  | -5.51        | 229983  | ε TIGD2     | -2.81        |
| 210118  | ε IL1A     | -5.35        | 218826  | ε SLC35F2   | -2.79        |
| 213241  | ε PLXNC1   | -5.26        | 226101  | ε PRKCE     | -2.78        |
| 203665  | ε HMOX1    | -5.26        | 214109  | ε LRBA      | -2.78        |
| 224367  | ε BEX2     | -5.23        | 209383  | ε DDIT3 /// | -2.77        |
| 201506  | ε TGFB1    | -5.19        | 209735  | ε ABCG2     | -2.76        |
| 231930  | ε ELMOD1   | -5.17        | 213422  | ε MXRA8     | -2.76        |
| 209875  | ε SPP1     | -4.93        | 203130  | ε KIF5C     | -2.75        |
| 207057  | ε SLC16A7  | -4.91        | 201631  | ε IER3      | -2.75        |
| 224657  | ε ERRF1    | -4.90        | 221477  | ε SOD2      | -2.75        |
| 1565162 | ε MGST1    | -4.82        | 231192  | ε LPAR3     | -2.74        |
| 1559789 | ε ZNF781   | -4.69        | 203439  | ε STC2      | -2.74        |
| 1555007 | ε WDR66    | -4.61        | 219682  | ε TBX3      | -2.73        |
| 229377  | ε GRTP1    | -4.59        | 1565483 | ε EGFR      | -2.70        |
| 211990  | ε HLA-DPA  | -4.49        | 237465  | ε USP53     | -2.69        |
| 226847  | ε FST      | -4.45        | 213112  | ε SQSTM1    | -2.69        |
| 228063  | ε NAP1L5   | -4.38        | 201024  | ε EIF5B     | -2.67        |
| 210102  | ε VWWA5A   | -4.37        | 227997  | ε IL17RD    | -2.67        |
| 234989  | ε NEAT1    | -4.30        | 212501  | ε CEBPB     | -2.65        |
| 220603  | ε MCTP2    | -4.24        | 220051  | ε PRSS21    | -2.65        |
| 206033  | ε DSC3     | -4.08        | 202357  | ε C2 /// CF | -2.65        |
| 212328  | ε LIMCH1   | -4.01        | 1559496 | ε PPA2      | -2.65        |
| 223000  | ε F11R     | -3.81        | 219496  | ε ANKRD5    | -2.64        |
| 223044  | ε SLC40A1  | -3.73        | 201996  | ε SPEN      | -2.63        |
| 215785  | ε CYFIP2   | -3.71        | 201641  | ε BST2      | -2.61        |
| 205476  | ε CCL20    | -3.68        | 204730  | ε RIMS3     | -2.61        |
| 204955  | ε SRPX     | -3.67        | 212358  | ε CLIP3     | -2.60        |
| 219926  | ε POPDC3   | -3.66        | 219118  | ε FKBP11    | -2.59        |
| 224831  | ε CPEB4    | -3.64        | 203455  | ε SAT1      | -2.58        |
| 1553973 | ε SPINK6   | -3.64        | 228221  | ε SLC44A3   | -2.57        |
| 206295  | ε IL18     | -3.63        | 202342  | ε TRIM2     | -2.57        |
| 202856  | ε SLC16A3  | -3.58        | 228624  | ε TMEM14    | -2.56        |
| 203184  | ε FBN2     | -3.51        | 228573  | ε ANTXR2    | -2.56        |
| 206376  | ε SLC6A15  | -3.49        | 243541  | ε IL31RA    | -2.55        |
| 206857  | ε FKBP1B   | -3.46        | 222270  | ε SMEK2     | -2.55        |
| 205174  | ε QPCT     | -3.45        | 217478  | ε HLA-DMA   | -2.55        |
| 241950  | ε WWC1     | -3.43        | 1553798 | ε FBXL13    | -2.55        |
| 210538  | ε BIRC3    | -3.43        | 203037  | ε MTSS1     | -2.54        |
| 217996  | ε PHLDA1   | -3.41        | 223651  | γ CDC23     | -2.54        |
| 213664  | ε SLC1A1   | -3.36        | 238990  | γ TRIM61    | -2.53        |
| 202887  | ε DDIT4    | -3.30        | 204472  | ε GEM       | -2.53        |
| 223519  | ε ZAK      | -3.29        | 202565  | ε SVIL      | -2.51        |
| 231260  | ε BC03692  | -3.29        | 217969  | ε C11orf2   | -2.51        |
| 205924  | ε RAB3B    | -3.29        | 1560527 | ε NF-E4     | -2.51        |
| 223380  | ε LATS2    | -3.24        | 235004  | ε RBM24     | -2.51        |
| 202644  | ε TNFAIP3  | -3.24        | 229797  | ε MCOLN3    | -2.51        |
| 211478  | ε DPP4     | -3.23        | 227798  | ε SMAD1     | -2.49        |
| 202672  | ε ATF3     | -3.23        | 229275  | ε IGFN1     | -2.48        |
| 226272  | ε RCAN3    | -3.21        | 226668  | ε WDSUB     | -2.48        |
| 205659  | ε HDAC9    | -3.17        | 207826  | ε ID3       | -2.48        |
| 232530  | ε PLD1     | -3.17        | 222662  | ε PPP1R3    | -2.48        |
| 219049  | ε CSGALN   | -3.16        | 206157  | ε PTX3      | -2.48        |
| 204422  | ε FGF2     | -3.14        | 206120  | ε CD33      | -2.47        |
| 206100  | ε CPM      | -3.14        | 207845  | ε ANAPC1    | -2.47        |
| 235931  | ε FAM119A  | -3.13        | 1568609 | ε FAM91A2   | -2.47        |
| 203934  | ε KDR      | -3.12        | 225308  | ε TANC1     | -2.46        |
| 221581  | ε LAT2     | -3.11        | 227399  | ε VGLL3     | -2.45        |
| 201034  | ε ADD3     | -3.10        | 208483  | γ KRT33A    | -2.44        |

**FIG. S3. Genes downmodulated during SN12C-LM2 transition**  
Comparison of gene expression of LM cells with parental SN12C cells. Genes upregulated 3.5 folds or higher in LM cells are shown. Genes in blue represent epithelial specific genes.
