# Supplementary material for: Genomic Deregulation during Metastasis of Renal Cell Carcinoma Implements a Myofibroblast-Like Program of Gene Expression
Source: Oxford University Press journal article supplement (doi:10.1158/0008-5472.can-10-2279), 2010-10-15
Supplement: 00085472can102279-sup-sfig_4.pdf [file 00085472can102279-sup-sfig_4.pdf]

| chromosome | start     | end       | p-value<br>(Attribute) | length<br>(bps) |
|------------|-----------|-----------|------------------------|-----------------|
| 1          | 13891201  | 15464388  | 0.0455                 | 1573188         |
| 1          | 15464388  | 16239838  | 0.0455                 | 775451          |
| 1          | 16320062  | 29145198  | 0.0455                 | 12825137        |
| 1          | 147260494 | 147713194 | 0.0455                 | 452701          |
| 1          | 246868539 | 246877950 | 0.0455                 | 9412            |
| 2          | 120465088 | 131955492 | 0.0455                 | 11490405        |
| 2          | 131955492 | 132055294 | 0.0455                 | 99803           |
| 2          | 132055294 | 149709137 | 0.0455                 | 17653844        |
| 2          | 149709137 | 150082834 | 0.0455                 | 373698          |
| 2          | 150082834 | 159689644 | 0.0455                 | 9606811         |
| 2          | 159689644 | 159713752 | 0.0455                 | 24109           |
| 2          | 159713752 | 159844079 | 0.0455                 | 130328          |
| 2          | 199923760 | 199991956 | 0.0455                 | 68197           |
| 2          | 202692290 | 226849916 | 0.0455                 | 24157627        |
| 2          | 226943029 | 242717043 | 0.0455                 | 15774015        |
| 3          | 155371815 | 155521429 | 0.0455                 | 149615          |
| 4          | 41440     | 15525270  | 0.0455                 | 15483831        |
| 4          | 38284700  | 41490445  | 0.0455                 | 3205746         |
| 4          | 41490445  | 47962559  | 0.0455                 | 6472115         |
| 4          | 47962559  | 48586226  | 0.0455                 | 623668          |
| 4          | 48586226  | 53493674  | 0.0455                 | 4907449         |
| 4          | 53493674  | 63545537  | 0.0455                 | 10051864        |
| 4          | 63545537  | 68888732  | 0.0455                 | 5343196         |
| 4          | 69404572  | 143532058 | 0.0455                 | 74127487        |
| 4          | 143532058 | 143546473 | 0.0455                 | 14416           |
| 4          | 143546473 | 159760272 | 0.0455                 | 16213800        |
| 6          | 43837140  | 43925998  | 0.0455                 | 88859           |
| 6          | 154645493 | 154727286 | 0.0455                 | 81794           |
| 6          | 165626804 | 165635655 | 0.0455                 | 8852            |
| 7          | 93102325  | 93183103  | 0.0455                 | 80779           |
| 8          | 39505721  | 39508473  | 0.0455                 | 2753            |
| 8          | 35016549  | 36063036  | 0.0455                 | 1046488         |
| 8          | 36063036  | 36599311  | 0.0455                 | 536276          |
| 8          | 51198262  | 51214482  | 0.0455                 | 16221           |
| 8          | 81728754  | 81734294  | 0.0455                 | 5541            |
| 9          | 105551410 | 105564743 | 0.0455                 | 13334           |
| 9          | 82342141  | 82364983  | 0.0455                 | 22843           |
| 9          | 85626436  | 85758349  | 0.0455                 | 131914          |
| 13         | 18065982  | 24225874  | 0.0455                 | 6159893         |
| 13         | 100665120 | 100671134 | 0.0455                 | 6015            |
| 14         | 22049477  | 22083764  | 0.0455                 | 34288           |
| 16         | 28112     | 1480768   | 0.0455                 | 1452657         |
| 18         | 34464647  | 34475738  | 0.0455                 | 11092           |
| 21         | 14340736  | 18529142  | 0.0455                 | 4188407         |
| 22         | 18691848  | 19096618  | 0.0455                 | 404771          |
| X          | 40829860  | 40931207  | 0.0455                 | 101348          |

**FIG. S4. Genomic copy number analysis.** Regions showing changes in DNA copy number, LM2 vs SN12C
