# Supplementary material for: Genomic Deregulation during Metastasis of Renal Cell Carcinoma Implements a Myofibroblast-Like Program of Gene Expression
Source: Oxford University Press journal article supplement (doi:10.1158/0008-5472.can-10-2279), 2010-10-15
Supplement: 00085472can102279-sup-sfig_5.pdf [file 00085472can102279-sup-sfig_5.pdf]

| <i>Cytoband</i> | <i>Gene Sympo</i> | <i>Fold-Change (LM vs</i> | <i>Chromosome Location</i> |
|-----------------|-------------------|---------------------------|----------------------------|
| 13q12.11        | LATS2             | -1.57                     | chr13.21548578.21635655    |
| 16p13.3         | FBXL16            | 1.65                      | chr16.742499.743126        |
| 1p36.11         | RCAN3             | -2.46                     | chr1.24862824.24867531     |
| 1p36.21         | P1-21O18.         | -2.00                     | chr1.14925199.15393109     |
| 2q37.3          | ASB1              | -2.20                     | chr2.239335625.239360891   |
| 2q33.3          | FAM119A           | -2.14                     | chr2.208473838.208474361   |
| 2q24.1          | NR4A2             | -1.77                     | chr2.157180950.157189213   |
| 2q23.3          | RND3              | -1.68                     | chr2.151324711.151344169   |
| 4p14            | ---               | -2.42                     | chr4.39124003.39125224     |
| 4p14            | APBB2             | -2.27                     | chr4.40812044.40816815     |
| 4p12            | ATP10D            | -1.95                     | chr4.47560039.47595436     |
| 4p16.2          | CYTL1             | -3.64                     | chr4.5016317.5021200       |
| 4p12            | FRYL              | -1.48                     | chr4.48501281.48522706     |
| 4p14            | KLHL5             | -1.97                     | chr4.39064545.39124044     |
| 4p13            | LIMCH1            | -3.64                     | chr4.41614936.41702062     |
| 4p11            | OCIAD2            | -1.87                     | chr4.48887398.48908801     |
| 4p12            | SLAIN2            | -1.80                     | chr4.48343433.48428219     |
| 4p14            | UBE2K             | -2.29                     | chr4.39781731.39784409     |
| 4q12            | ---               | -1.96                     | chr4.56294071.56294744     |
| 4q12            | ---               | -1.85                     | chr4.56294561.56298429     |
| 4q26            | ---               | -1.66                     | chr4.114374777.114375243   |
| 4q31.22         | ABCE1             | -1.90                     | chr4.146019485.146050332   |
| 4q22.1          | ABCG2             | -2.08                     | chr4.89013200.89079754     |
| 4q13.3          | ADAMTS3           | -1.94                     | chr4.73146686.73434517     |
| 4q21.3          | AFF1              | -2.12                     | chr4.87928139.88062191     |
| 4q31.22         | ANAPC10           | -2.05                     | chr4.145916319.146019342   |
| 4q28.1          | ANKRD50           | -1.56                     | chr4.125585205.125593586   |
| 4q21.21         | ANTXR2            | -1.91                     | chr4.80825359.80826841     |
| 4q31.3          | ARFIP1            | -1.82                     | chr4.153701111.153833062   |
| 4q26            | CAMK2D            | -2.17                     | chr4.114373569.114683203   |
| 4q13.3          | CXCL1             | -4.44                     | chr4.74735108.74736954     |
| 4q13.3          | CXCL2             | -5.84                     | chr4.74962800.74964893     |
| 4q13.3          | CXCL5             | -3.03                     | chr4.74862997.74864447     |
| 4q31.3          | FBXW7             | -2.07                     | chr4.153242410.153243031   |
| 4q27            | FGF2              | -1.60                     | chr4.123747862.123819377   |
| 4q32.1          | GLRB              | -2.00                     | chr4.157997402.158092418   |
| 4q21.22         | HPSE              | -2.08                     | chr4.84213614.84256306     |
| 4q13.3          | IL8               | -4.05                     | chr4.74606368.74607739     |
| 4q31.21         | INPP4B            | -2.62                     | chr4.142949893.143352533   |
| 4q12            | KDR               | -1.79                     | chr4.55944648.55991763     |
| 4q31.3          | LRBA              | -1.98                     | chr4.151185598.151388930   |
| 4q31.1          | MAML3             | -1.96                     | chr4.140637908.140638418   |
| 4q32.1          | MAP9              | -2.28                     | chr4.156263809.156264473   |
| 4q13.3          | MTHFD2L           | -2.57                     | chr4.75065510.75168813     |
| 4q22.1          | NAP1L5            | -2.61                     | chr4.89617065.89618072     |
| 4q32.1          | PDGFC             | -2.49                     | chr4.157682763.157892547   |
| 4q32.1          | PLRG1             | -2.06                     | chr4.155456157.155456711   |
| 4q31.23         | PRMT10            | -1.85                     | chr4.148558944.148575570   |
| 4q25            | SGMS2             | -1.85                     | chr4.108834104.108836188   |
| 4q31.3          | SH3D19            | -1.77                     | chr4.152041187.152069170   |
| 4q13.3          | SLC4A4            | -1.92                     | chr4.72204816.72437800     |
| 4q31.22         | SMAD1             | -2.02                     | chr4.146479198.146480329   |
| 4q31.21         | SMARCA5           | -2.34                     | chr4.144474160.144475891   |
| 4q12            | SRP72             | -1.76                     | chr4.57349374.57357735     |
| 4q22.1          | TIGD2             | -2.39                     | chr4.90035004.90036195     |
| 4q31.21         | USP38             | -2.13                     | chr4.144127298.144142743   |

**FIG. S5. Integration of DNA copy number alteration and gene expression in RCC cell lines.** Genes with altered mRNA expression and variations in the corresponding genomic region within the identified aberrant regions.
