# Supplementary material for: Genomic Deregulation during Metastasis of Renal Cell Carcinoma Implements a Myofibroblast-Like Program of Gene Expression
Source: Oxford University Press journal article supplement (doi:10.1158/0008-5472.can-10-2279), 2010-10-15
Supplement: 00085472can102279-sup-sfig_10.pdf [file 00085472can102279-sup-sfig_10.pdf]

A

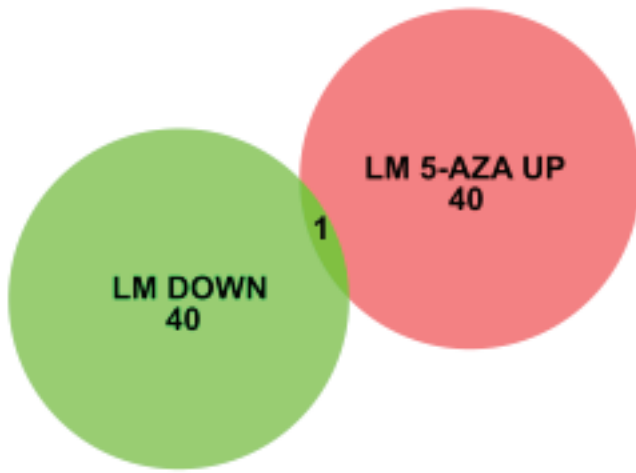

hsa-miR-224

B

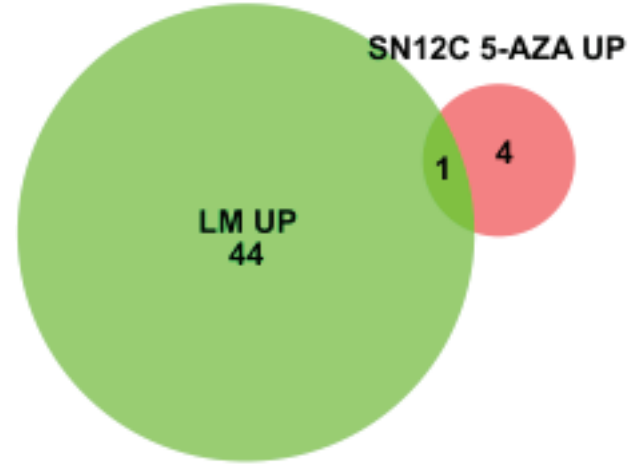

hsa-miR-34c-5p

**FIG. S10. Promoter methylation related miRNA expression changes.** Cells were treated with the DNA methyltransferase inhibitor 5'-AZA, followed by global gene expression analysis using miRNA microarrays **(A)** Venn diagram of miRNA predicted to be hypomethylated in SN12C and spontaneously hypermethylated in LM2 cells. **(B)** Venn analysis of genes predicted to be hypermethylated in SN12C and spontaneously demethylated in LM2 cells.
