# Supplementary material for: Genomic Deregulation during Metastasis of Renal Cell Carcinoma Implements a Myofibroblast-Like Program of Gene Expression
Source: Oxford University Press journal article supplement (doi:10.1158/0008-5472.can-10-2279), 2010-10-15
Supplement: 00085472can102279-sup-sfig_11.pdf [file 00085472can102279-sup-sfig_11.pdf]

| AmpliconName     | GenomicSequenceTemplate                                                                                                                                                                                                                                                                                                   | LeftPrimer                        | RightPrimer                         | Direction | TargetSequence                                                                                                                                                                                                              | TaregtLength | TargetCpG | CpGANalyzedInT |
|------------------|---------------------------------------------------------------------------------------------------------------------------------------------------------------------------------------------------------------------------------------------------------------------------------------------------------------------------|-----------------------------------|-------------------------------------|-----------|-----------------------------------------------------------------------------------------------------------------------------------------------------------------------------------------------------------------------------|--------------|-----------|----------------|
| COL1A1__05       | TTCTCTGTTTTGGAGAGGTCCTCAG<br>CATGCCTCTTTATGCCCTCCCTTAG<br>CTCTTGCCAGGATATCAGAGGGTGA<br>CTGGGGCACAGCCAGGAGGACCCC<br>CTCCCCAACACCCCCAACCTTCCAC<br>CTTTGGAAGTCTCCCCACCCAGCTCC<br>CCAGTTCGCCAGTCCACTTCTTCTA<br>GATTGGAGGTCCAGGAAGAGAGC<br>AGAGGGGCACCCCTACCCACTGGTT<br>AGCCACGCCATTCTGAGGACCCAG<br>CTGCACCCTACCACAGCACCTCTG   | TTTTAAATTT<br>TTGGGAGTGT<br>AAGGA | AAACAATCTTT<br>CCTTATAAATC<br>ATCCC | F         | TCCCAAACCTTTGGGAG<br>TGCAAGGATACTCTATA<br>TCGCGCCTTGCGCTTGG<br>TCCCGGGGCGCGGCT<br>TAAAACGAGACGTGGA<br>TGATCCGGAGACTCGG<br>GAATGGAAGGGAGATG<br>ATGAGGGCTCTTCTCG<br>GCGCCCTGAGACAGGA<br>GGGAGCTCACCTGGG<br>GCGAGTTGGGTTGA     | 392          | 30        | 23             |
| CRIP1__07        | TGCAGAGAGAGGGCTCCCCTGCTCA<br>GTGACAGGAGAGGGGGCTGACAGT<br>GACCTGGGCTCCCTTCTGAGGCTG<br>GCCAGTCAGCTAGAGGGCTGACCCC<br>AAAGCCCGAGGCCAGCGCAGCCCC<br>CTTGCCCTCTGAATCTGGGGGGC<br>GGGTGAGGCGGGACAGACTCCGCCT<br>GGCACCGGACCATCTCCGCCTCA<br>ACTTTGACAGCTACTTGACCGCTCT<br>GGCCGCCCTGGGCGCTACCCGAGA<br>GATAAGGGCCCTCCCTGCGCCCG         | GGATTAGAT<br>GATTTTTTT<br>GGGTTT  | CACCTCCTAT<br>TACACTAAA<br>ACACTT   | F         | GGACCAGATGATCTTTC<br>TTGGCCCTGGGCCTAG<br>ATTGAGGTCCCCAGGG<br>TCCAAGTCTGGGTCA<br>GAGGCGGGGCGCGAG<br>GGGCGGGTCTCCAAG<br>GGGCGGGTCCCGGG<br>TCCCTGAAAGCGCGG<br>ACCAGGCCGATCCAC<br>CCAGTCTCGCCTGCA<br>GCCCGTCCGCCCCAGC           | 246          | 19        | 17             |
| CRIP2__30        | AGAGTGGGGTGTGGGGTGCGGT<br>GACTGGCATGACCCCTCAATCTCCC<br>GCCTGACCCCTCAGGTCAGGCCCT<br>GGGCCCCAGGCACGCAGCTGTGTC<br>TGGGCGGTGCGGGAGAAGGACTG<br>GAGTGTGACCCAGCCCGGGGAC<br>AGAGGGCAGCCCACTCTCCCTC<br>CCTTCCCTTCTAACTCTCACCGCT<br>CCCCGCCGCCCTGGGTGGAAGT<br>GCTTGGGGTGGACGCTTAAGCGCG<br>GATCCCTCGGCCTGTGTCGCCCG                   | TTTGTTAGG<br>GTTGTTTTGA<br>TTTTG  | AAACCTAAAC<br>CCTTCTCTA<br>AACC     | R         | CCTGTCCAGGCTGTTT<br>TGACCTTGGAGGCA<br>GGGATCCTGGACACCTG<br>GGTGCTTGACACAA<br>GGTCCCTCTCACGTTG<br>CGGGAATCGCGTGTCA<br>CACCCGCCCCACCCTA<br>CCCCCGTGTGAAACTCC<br>TGGGGAACTGGCGCC<br>AAGGGAATGCGTCGGG<br>ACAAGCAGGAGGCAGA       | 341          | 18        | 18             |
| S100A4intron__01 | ACTTCCAAGAATCTTTATTGAACTTG<br>CTCAGCATCAAGCACGTGTCTGAAG<br>GAGCCAGGGTGGAAAAAAAAAAGT<br>GCCCACTGGCGACAGGGAGGGCCC<br>CAGCTGGCAGACCCCAACCACAT<br>CAGAGGAGTTTTTCATTTCTCTGGG<br>CTGCTTATCTGGGAAGCCTTCAAAG<br>AATTCGTTACACATCATGGCGATGC<br>AGGACAGGAAGACACAGTACTCTTG<br>GAAGTCCACCTCGTTGTCCTGTGTC<br>TGTCCAAGTTGCTCATCAGCTTCTGG | TTTTAAGGTT<br>AAGTTAGGG<br>TGAGAA | TTCCAAAATA<br>ATCAATATAC<br>ACAA    | F         | CCTCAAGGCTAAGCTAG<br>GGTGGAGAAGGTGCTC<br>CTTGATAAGGAAGTCT<br>GAGTACTGGTGAATG<br>GAAAAATGACGGGACC<br>ACTACATTTTACCCAA<br>GGTTGTTCTAATAATCC<br>CATGAGGTAGTAATAGT<br>CATGAAAACAATATAT<br>AAACTGTGTTATGTTG<br>ATACAAATATACATTGT | 348          | 4         | 4              |
| S100A4intron__05 | ACTTCCAAGAATCTTTATTGAACTTG<br>CTCAGCATCAAGCACGTGTCTGAAG<br>GAGCCAGGGTGGAAAAAAAAAAGT<br>GCCCACTGGCGACAGGGAGGGCCC<br>CAGCTGGCAGACCCCAACCACAT<br>CAGAGGAGTTTTTCATTTCTCTGGG<br>CTGCTTATCTGGGAAGCCTTCAAAG<br>AATTCGTTACACATCATGGCGATGC<br>AGGACAGGAAGACACAGTACTCTTG<br>GAAGTCCACCTCGTTGTCCTGTGTC<br>TGTCCAAGTTGCTCATCAGCTTCTGG | GTATGGGGTT<br>AGGTAGTGA<br>GTGGT  | CCTACTCCAA<br>ATCCTAACTAC<br>TATCAT | F         | GCATGGGGCCAGGCAG<br>TGAGTGGTGGTGTCAA<br>TGTGTTCCACCCAGG<br>CAGCCACCCCACTGATA<br>GATGCCCTCTGTAGCTA<br>ATGCTCTAGAGCAAGA<br>CTGCTGCCCTCTCTGTG<br>GGAAATGCCCCACGTG<br>GGGACTCACTCAGGCA<br>CTACCCACTACCCCA<br>AGAAGCTGGGAGCTC    | 329          | 4         | 4              |
